# Supplementary material
Source: PubMed Central journal article supplement (PMC5124417)
Supplement: NIHMS774669-supplement-supplement_1.pdf [file NIHMS774669-supplement-supplement_1.pdf]

| Pt | rCBV          |          |                                 |                    | rCBF          |          |                                 |                    |
|----|---------------|----------|---------------------------------|--------------------|---------------|----------|---------------------------------|--------------------|
|    | Max Enhancing | Max rCBV | Non-enhancing T2 hyperintensity | Contralateral NAWM | Max Enhancing | Max rCBV | Non-enhancing T2 hyperintensity | Contralateral NAWM |
| 1  | -68.42        | -72.42   | -51.43                          | 21.48              | -54.83        | -61.46   | -35.23                          | -45.21             |
| 2  | -32.39        | -71.77   | 160.57                          | -21.31             | -45.13        | -69.13   | -22.62                          | 37.05              |
| 3  | 67.54         | -13.19   | 82.49                           | 25.82              | 29.37         | -26.37   | 45.23                           | -15.69             |
| 4  | -53.85        | -12.63   | 25.62                           | -35.12             | -43.12        | -14.31   | 21.87                           | 63.31              |
| 5  | 18.93         | -56.17   | 135.82                          | 15.14              | 11.42         | -58.71   | 142.72                          | -10.19             |
| 6  | -29.53        | -6.29    | 15.54                           | 1.19               | -29.17        | -14.73   | 45.75                           | -18.08             |
| 7  | -45.13        | -79.18   | -40.52                          | -58.23             | -33.74        | -77.35   | -29.11                          | 53.53              |
| 8  | -37.53        | -41.62   | 78.37                           | -3.76              | -45.48        | -46.50   | 114.59                          | 27.19              |
| 9  | -33.79        | -49.32   | -59.43                          | 145.22             | -33.43        | -43.36   | -42.42                          | -21.71             |
| 10 | -18.11        | -32.83   | 7.74                            | -19.75             | -10.35        | -32.88   | 9.11                            | 3.17               |
| 11 | -31.33        | 3.42     | 35.49                           | 11.29              | -27.13        | 14.53    | 33.42                           | -22.88             |
| 12 | 115.73        | -55.83   | 97.37                           | -3.20              | 56.53         | -67.61   | 65.57                           | 73.83              |
| 13 | 23.58         | 40.85    | 183.42                          | -82.35             | 17.53         | 41.29    | 157.43                          | -55.71             |
| 14 | -36.42        | -40.98   | -15.68                          | 194.64             | -35.47        | -46.89   | -13.66                          | 49.91              |
| 15 | -25.13        | 35.42    | 31.93                           | -2.33              | -28.51        | 45.21    | 16.53                           | 1.43               |
| 16 | -60.73        | -37.63   | -35.13                          | -6.76              | -56.33        | 2.32     | -23.12                          | -3.89              |
| 17 | 50.51         | -23.35   | 158.62                          | 6.36               | 35.21         | -25.63   | 150.48                          | -9.21              |
| 18 | -0.39         | -30.41   | 256.32                          | 48.57              | -22.32        | -38.72   | -67.79                          | 67.99              |
| 19 | 3.41          | -3.43    | 25.13                           | -15.47             | 23.15         | -10.37   | 24.35                           | -67.63             |
| 20 | 5.71          | 22.24    | 31.28                           | -15.51             | 4.12          | 26.49    | 20.45                           | 0.81               |
| 21 | -5.17         | -35.27   | -8.15                           | -15.21             | 1.53          | -28.63   | -5.69                           | -1.54              |
| 22 | -31.72        | -14.83   | -85.63                          | 2.16               | -28.19        | -7.91    | -70.27                          | 51.49              |
| 23 | 39.75         | -40.63   | 219.24                          | -7.61              | 45.79         | -41.09   | 210.81                          | 5.81               |
| 24 | -24.59        | -66.38   | -62.91                          | -25.21             | -17.32        | -65.13   | -65.93                          | -3.71              |
| 25 | -30.89        | -8.09    | 144.92                          | 27.92              | -65.53        | -50.09   | 60.69                           | 34.09              |
